# Supplementary material for: Social Isolation Alters Social and Mating Behavior in the R451C Neuroligin Mouse Model of Autism
Source: Hindawi journal article supplement (doi:10.1155/2017/8361290), 2017-01-01

**a**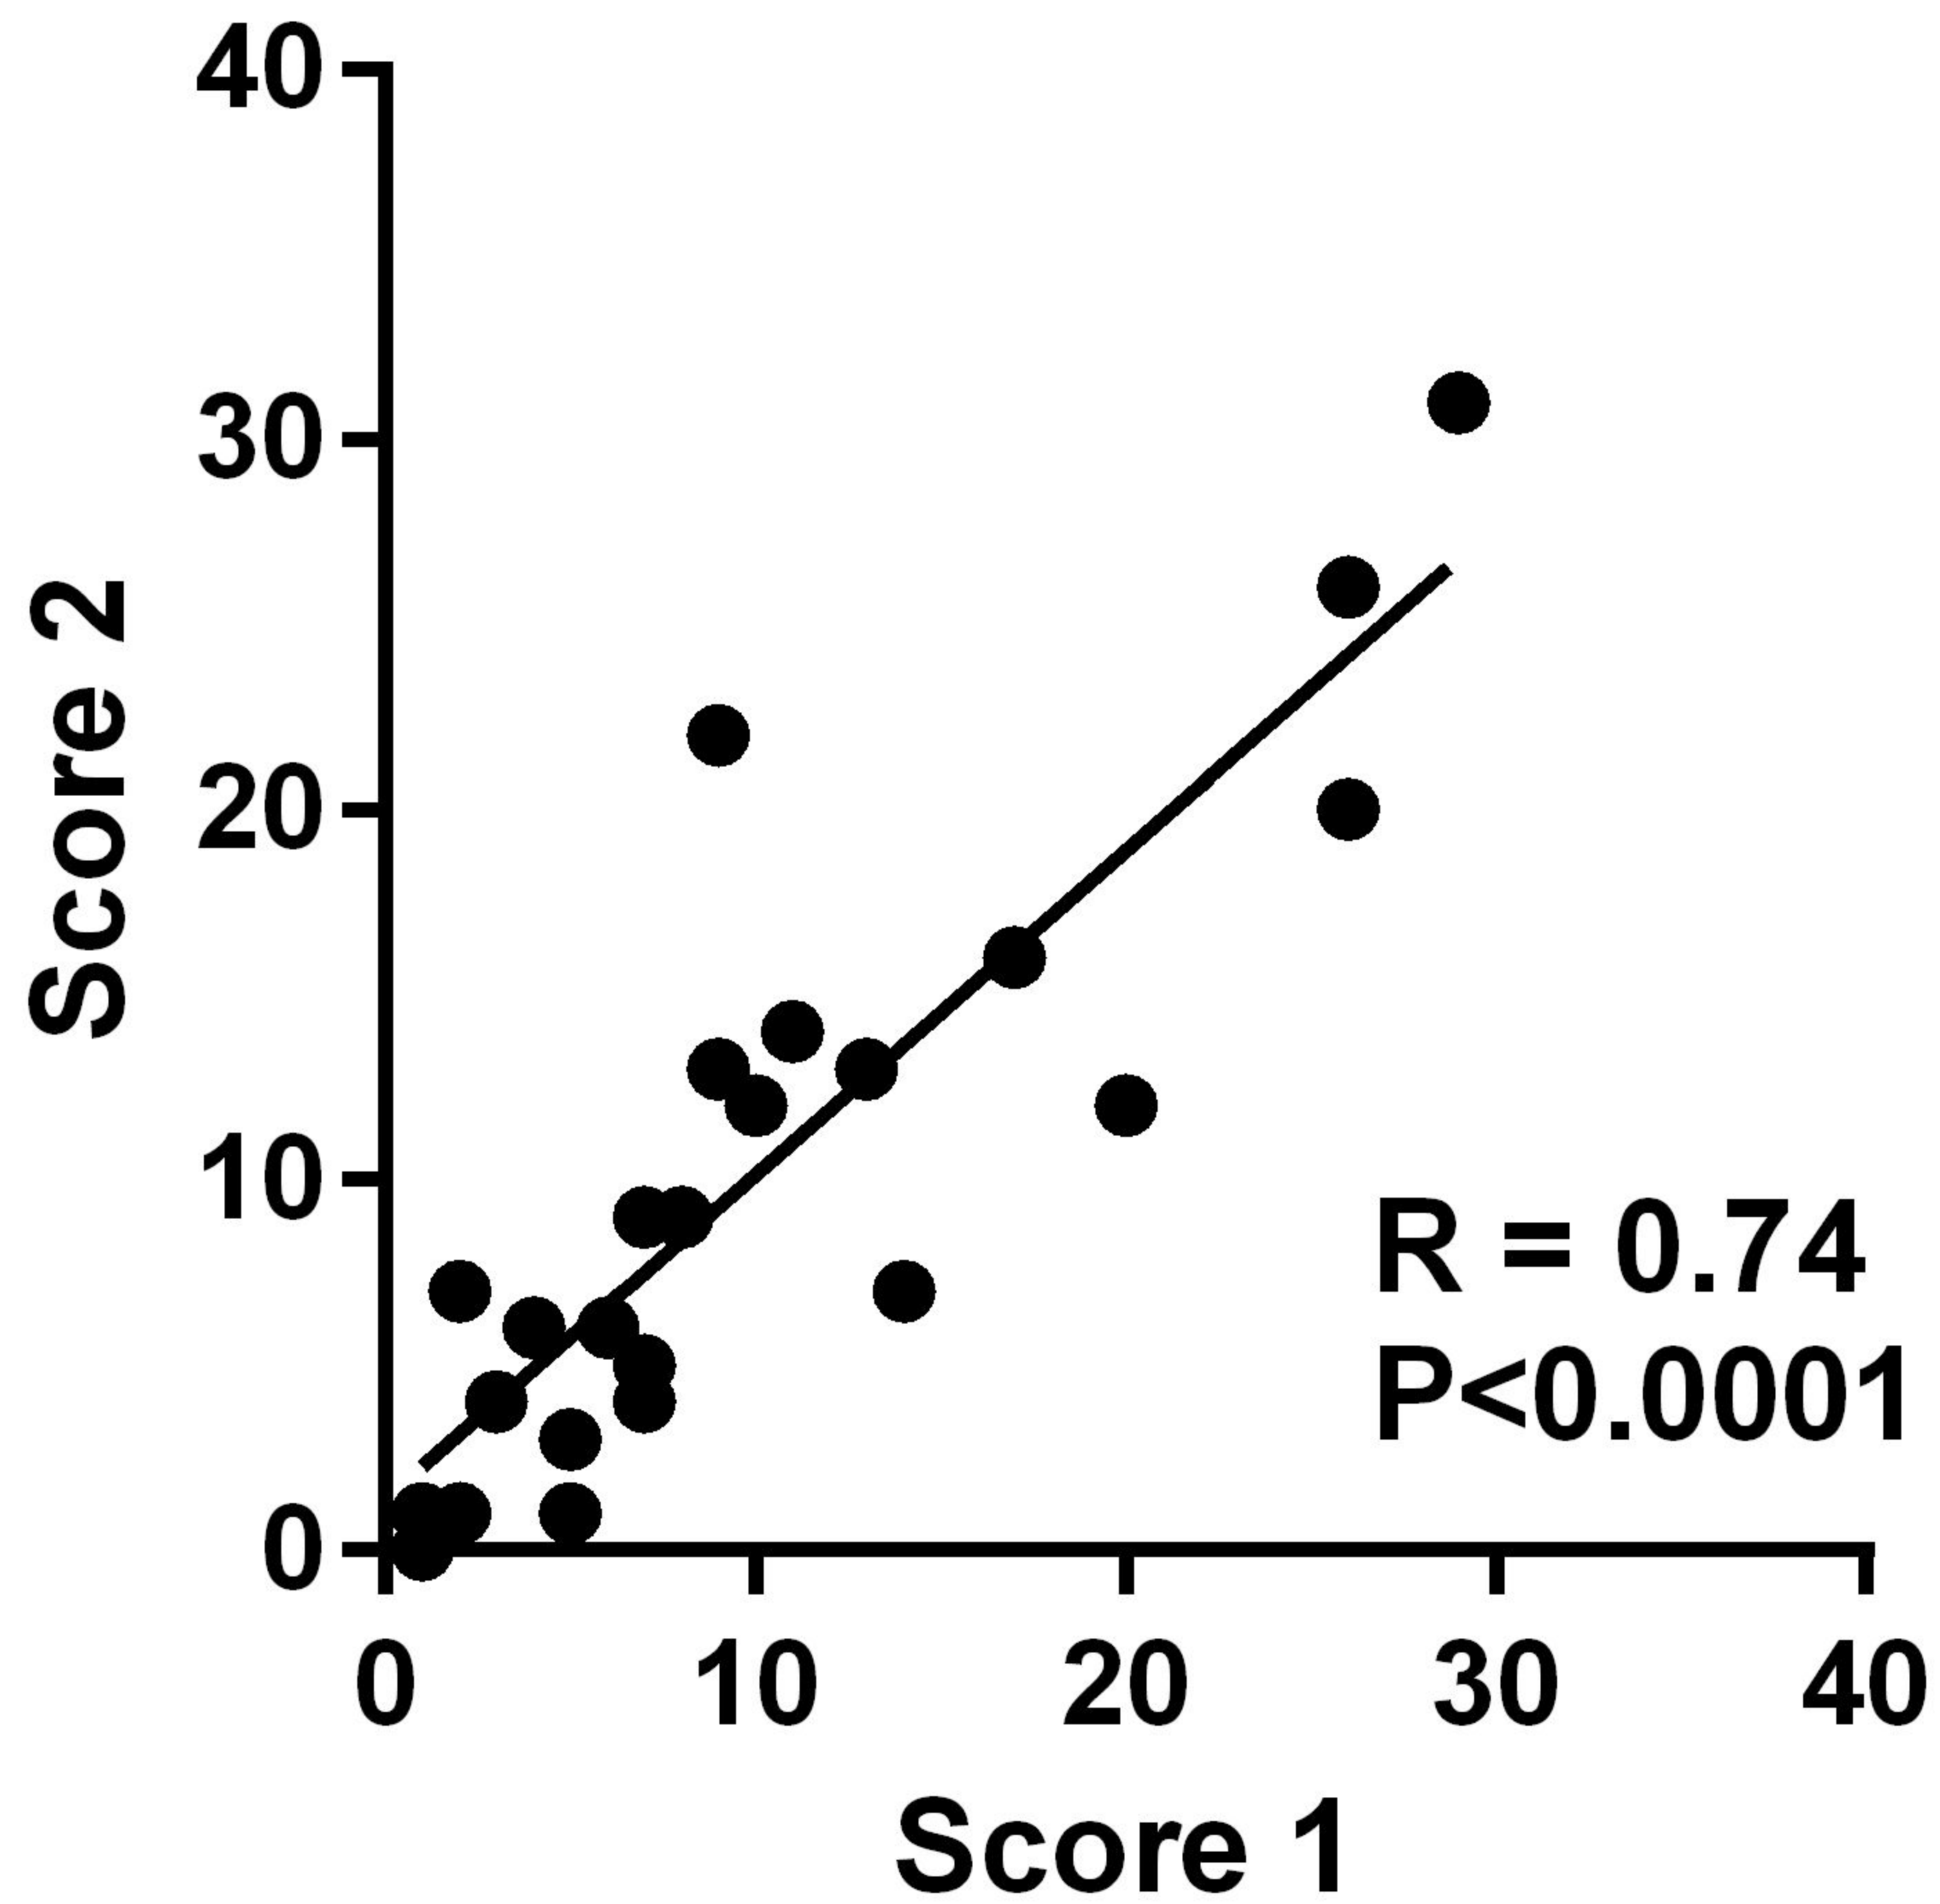**b**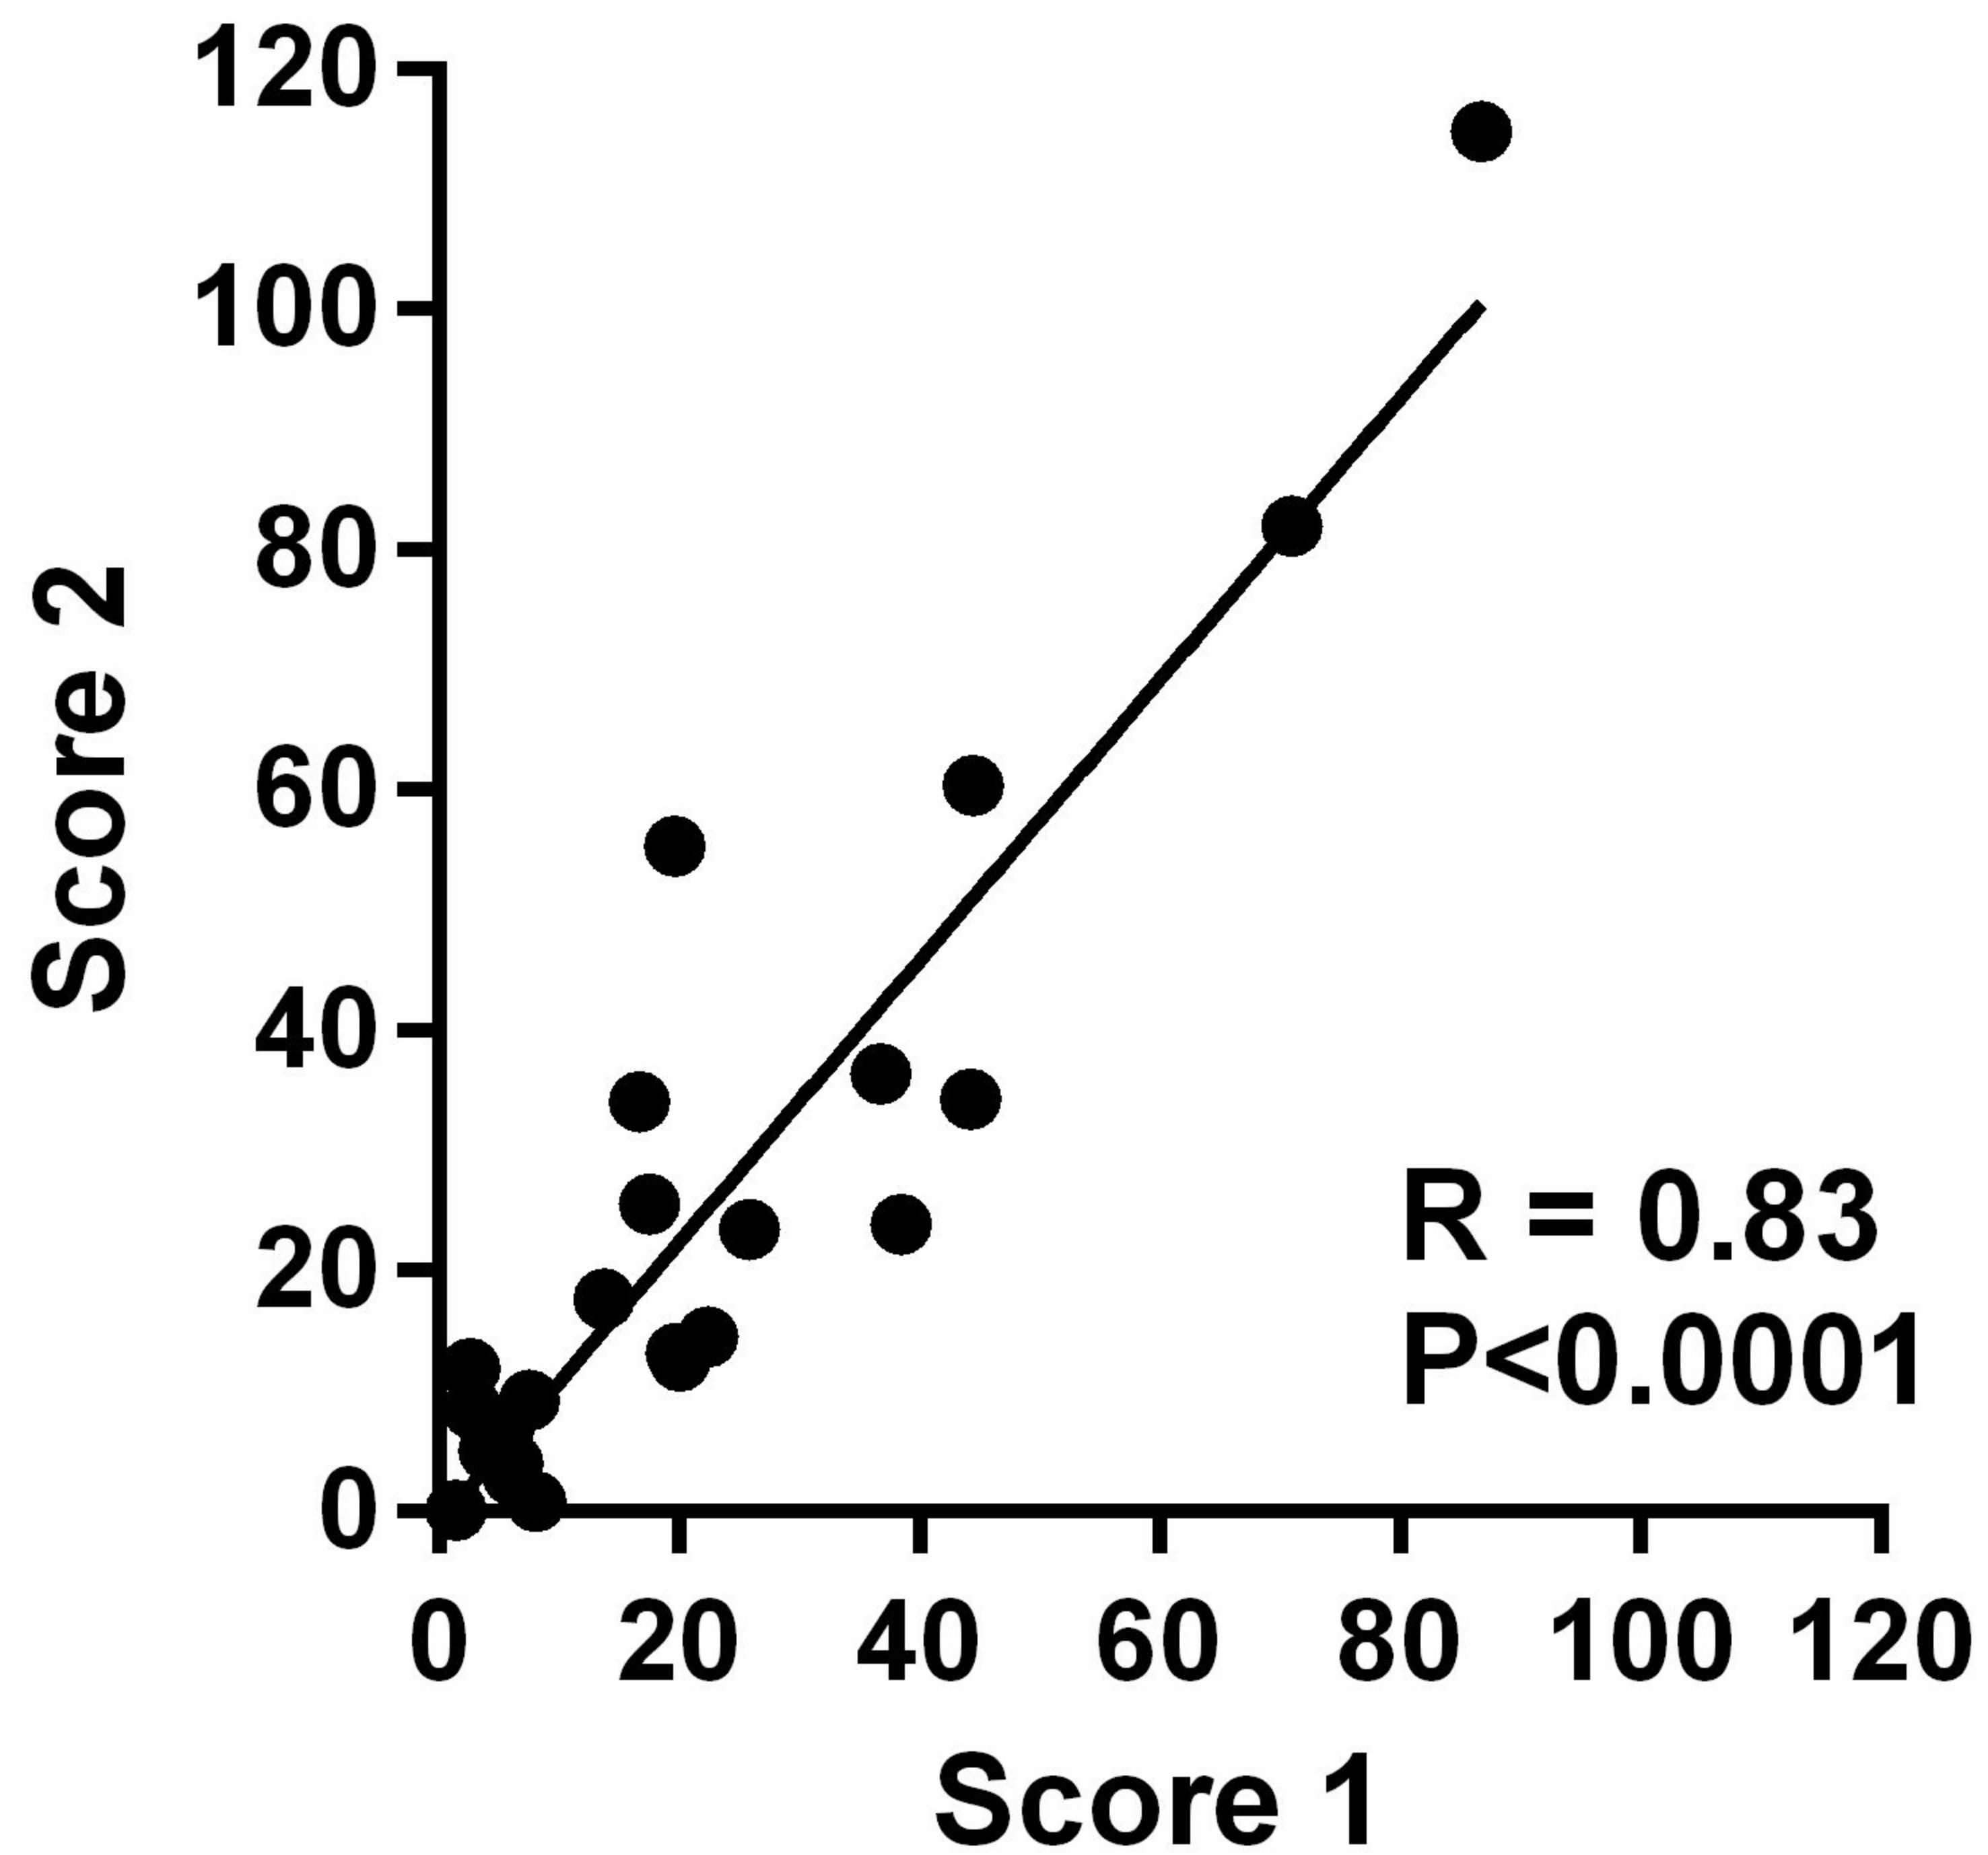

Supplement: f1 [file 8361290.f1.pdf]
